# Supplementary material
Source: PubMed Central journal article supplement (PMC3260393)
Supplement: NIHMS340804-supplement.pdf [file NIHMS340804-supplement.pdf]

## SUPPLEMENTAL MATERIAL

### Supplemental Methods

#### *Mice*

All mice were maintained on a mixed genetic background. *Wnt1-Cre*<sup>1</sup> and *Z/EG*<sup>2</sup> mice were genotyped as previously described. All animal protocols were approved by the University of Pennsylvania Institutional Animal Care and Use Committee.

#### *Histology and immunohistochemistry*

Samples were harvested, fixed overnight in 4% paraformaldehyde and subsequently dehydrated through an ethanol series. All samples were then paraffin embedded and sectioned. The antibody used for SM-22 alpha immunohistochemistry was anti-SM-22 goat polyclonal (Ab10135, Abcam).

### Supplemental Tables

Supplemental Table 1: Genomic Location of Jagged1 ECRs

| <b>ECR #</b> | <b>Chromosome2 (chr2) Location</b> |
|--------------|------------------------------------|
| ECR1         | chr2:136942017-136942473           |
| ECR2         | chr2:136961395-136961782           |
| ECR3         | chr2:136962589-136963124           |
| ECR4         | chr2:136936138-136936622           |
| ECR5         | chr2:136935754-136935968           |
| ECR6         | chr2:136933719-136934335           |

|       |                          |
|-------|--------------------------|
| ECR7  | chr2:136932948-136933314 |
| ECR8  | chr2:136925118-136925510 |
| ECR9  | chr2:136924094-136924282 |
| ECR10 | chr2:136917659-136918032 |
| ECR11 | chr2:136913540-136914031 |
| ECR12 | chr2:136904329-136904753 |
| ECR13 | chr2:136903925-136904234 |
| ECR14 | chr2:136899727-136900004 |
| ECR15 | chr2:136899238-136899515 |

Supplemental Table 2. Jagged1 ECR, ECR6 deletions and ECR6 mutagenesis Primers

| <b>Evolutionarily Conserved Region Primers</b> |                                                        |
|------------------------------------------------|--------------------------------------------------------|
| <b>Primer Name</b>                             | <b>Primer Sequence (5' to 3')</b>                      |
| ECR1-Forward                                   | GGGGACAAGTTTGTACAAAAAAGCAGGCTCCGGCTCCCAGACCGGCGCTCCGG  |
| ECR1-Reverse                                   | GGGGACCACTTTGTACAAGAAAGCTGGGTGTCCCGGCTCTAATATACTCCGT   |
| ECR2-Forward                                   | GGGGACAAGTTTGTACAAAAAAGCAGGCTGAATAGGGAAGACAAGAGACATG-  |
| ECR2-Reverse                                   | GGGGACCACTTTGTACAAGAAAGCTGGGTGGTTTCTCCTGTCCCACAGATGCGT |
| ECR3-Forward                                   | GGGGACAAGTTTGTACAAAAAAGCAGGCTGCCAAAAGAAAGGCAAAGACAATCA |
| ECR3-Reverse                                   | GGGGACCACTTTGTACAAGAAAGCTGGGTCTTCCAGAATATTCCAAATACA    |
| ECR4-Forward                                   | GGGGACAAGTTTGTACAAAAAAGCAGGCTTGTTGCTAGGTTACTGCTTGG     |
| ECR4-Reverse                                   | GGGGACCACTTTGTACAAGAAAGCTGGGTGACATGTCAATAGAGTGTGAT     |
| ECR5-Forward                                   | GGGGACAAGTTTGTACAAAAAAGCAGGCTTGAATATTTTATACTCTGGCCA    |
| ECR5-Reverse                                   | GGGGACCACTTTGTACAAGAAAGCTGGGTGTGCCAACACAGCCATTGTACA    |
| ECR6-Forward                                   | GGGGACAAGTTTGTACAAAAAAGCAGGCTGGCACCTTCCTTTGCAGTGGT     |
| ECR6-Reverse                                   | GGGGACCACTTTGTACAAGAAAGCTGGGTAGGCATGAGAGAAAAGCAGGAGGT  |

|               |                                                       |
|---------------|-------------------------------------------------------|
| ECR7-Forward  | GGGGACAAGTTTGTACAAAAAAGCAGGCTACCCATGGGTGTGCGGTGCC     |
| ECR7-Reverse  | GGGGACCACTTTGTACAAGAAAGCTGGGTGCATATAGGTTTCCCAAAC      |
| ECR8-Forward  | GGGGACAAGTTTGTACAAAAAAGCAGGCTTAATGGGCATAGCTGGCATCT    |
| ECR8-Reverse  | GGGGACCACTTTGTACAAGAAAGCTGGGTTCGGAAGGGAAACAGGCTGGG    |
| ECR9-Forward  | GGGGACAAGTTTGTACAAAAAAGCAGGCTTGCTACTGTCATCAGAAT       |
| ECR9-Reverse  | GGGGACCACTTTGTACAAGAAAGCTGGGTAGACTATGCAAATGGCGTGTGG   |
| ECR10-Forward | GGGGACAAGTTTGTACAAAAAAGCAGGCTAAGGGAATGTTTTGGAGAGGG    |
| ECR10-Reverse | GGGGACCACTTTGTACAAGAAAGCTGGGTCTGAAAAAATAAACAAGCCG     |
| ECR11-Forward | GGGGACAAGTTTGTACAAAAAAGCAGGCTGTGAGTGGCCTCCCCTGAACT    |
| ECR11-Reverse | GGGGACCACTTTGTACAAGAAAGCTGGGTTGTGGACACATGTATACAGG     |
| ECR12-Forward | GGGGACAAGTTTGTACAAAAAAGCAGGCTCCCCACCATTTCGGTTTGA      |
| ECR12-Reverse | GGGGACCACTTTGTACAAGAAAGCTGGGTTGATGCAACAGGATTGCTCTAATG |
| ECR13-Forward | GGGGACAAGTTTGTACAAAAAAGCAGGCTAGGTTGTGGGCAGGTGCTTGT    |
| ECR13-Reverse | GGGGACCACTTTGTACAAGAAAGCTGGGTTACTGGATTTAAGAGCCTTCC    |
| ECR14-Forward | GGGGACCACTTTGTACAAGAAAGCTGGGTCCAGTTCCTGCAGGAGATTTAC   |
| ECR14-Reverse | GGGGACCACTTTGTACAAGAAAGCTGGGTCCAGTTCCTGCAGGAGATTTAC   |
| ECR15-Forward | GGGGACAAGTTTGTACAAAAAAGCAGGCTACAAGGTCAGTATCTCATCCGA   |
| ECR15-Reverse | GGGGACCACTTTGTACAAGAAAGCTGGGTACCCTCCTTTAGAAGATGAGCTT  |
|               |                                                       |

### ECR6 Deletion Series Primers

| Primer Name | Primer Sequence (5' to 3')                              |
|-------------|---------------------------------------------------------|
| D1-Forward  | GGGGACAAGTTTGTACAAAAAAGCAGGCTTGTCAAAACCTTGGTATCAAT      |
| D1-Reverse  | GGGGACCACTTTGTACAAGAAAGCTGGGTAGGCATGAGAGAAAAGCAGGAGGTTT |
| D2-Forward  | GGGGACAAGTTTGTACAAAAAAGCAGGCTAAGTGAAGGATGTGGCCTCAA      |
| D2-Reverse  | Same as Deletion1 Reverse                               |
| D3-Forward  | GGGGACAAGTTTGTACAAAAAAGCAGGCTAGCCACACATCTGGCCTCATTT     |
| D3-Reverse  | Same as Deletion1 Reverse                               |

|                                 |                                                       |
|---------------------------------|-------------------------------------------------------|
| D4-Forward                      | GGGGACAAGTTTGTACAAAAAAGCAGGCT GAGTCCTATAATTTGTAGGAA   |
| D4-Reverse                      | Same as Deletion1 Reverse                             |
| D5-Forward                      | GGGGACAAGTTTGTACAAAAAAGCAGGCTTAAATAAGGTGTAACCTTCACTAA |
| D5-Reverse                      | GGGGACCACTTTGTACAAGAAAGCTGGGTTGAGAGAAAAGCAGGAGGTTTCAT |
| D6-Forward                      | GGGGACAAGTTTGTACAAAAAAGCAGGCTGGCACCTTCCTTTGCAGTGGTGTT |
| D6-Reverse                      | GGGGACCACTTTGTACAAGAAAGCTGGGTCAGCCTCTTTAAGTTCCTA      |
|                                 |                                                       |
| <b>ECR6 Mutagenesis Primers</b> |                                                       |
| <b>Primer Name</b>              | <b>Primer Sequence (5' to 3')</b>                     |
| M1-Forward                      | CTTTGTGAGCATA <u>AA</u> TCCCACAGTTATCAGTGAACG         |
| M1-Reverse                      | CGTTCACTGATAACTGTGGGAT <u>I</u> ATGCTCACAAAG          |
| M2-Forward                      | CTTTGTGAGCATT <u>TT</u> CGGACAGTTATCAGTGAACG          |
| M2-Reverse                      | CGTTCACTGATAACTGT <u>CC</u> GAAAAATGCTCACAAAG         |
| M3-Forward                      | CTTTGTGAGCAT <u>GC</u> AGCCACAGTTATCAGTGAACG          |
| M3-Reverse                      | CGTTCACTGATAACTGTGG <u>CTGC</u> ATGCTCACAAAG          |
|                                 |                                                       |

Supplemental Table 3: Genotype distribution resulting from  $Pax3^{Cre/+}; Jag1^{flox/+}$  x  $Jag1^{flox/flox}$

| Age       | Genotype        |                    |                                   |                                      | Total |
|-----------|-----------------|--------------------|-----------------------------------|--------------------------------------|-------|
|           | $Jag1^{flox/+}$ | $Jag1^{flox/flox}$ | $Pax3^{Cre/+}$<br>$Jag1^{flox/+}$ | $Pax3^{Cre/+}$<br>$Jag1^{flox/flox}$ |       |
| E9.5-14.5 | 25              | 23                 | 21                                | 14                                   | 83    |
| P0        | 31              | 35                 | 34                                | 38                                   | 138   |
| P10-P12   | 14*             | 12*                | 11*                               | 14*                                  | 51*   |
| 3 weeks   | 14*             | 12*                | 11*                               | 5*                                   | 42*   |

|         |     |     |     |    |     |
|---------|-----|-----|-----|----|-----|
| 4 weeks | 14* | 12* | 11* | 0* | 37* |
|---------|-----|-----|-----|----|-----|

\* These offspring (51 total) were followed from the time of genotyping (P10-P12) until 4 weeks of age to determine post-natal lethality of *Pax3*<sup>Cre/+</sup> *Jag1*<sup>flox/flox</sup> mutants compared with their littermates.

Supplemental Table 4: Aortic arch phenotypes in *Pax3*<sup>Cre/+</sup>; *Jag1*<sup>flox/flox</sup> neonates and littermates

|                                        | Genotype |                               |                                  |                              |                                                               |                                                                  |
|----------------------------------------|----------|-------------------------------|----------------------------------|------------------------------|---------------------------------------------------------------|------------------------------------------------------------------|
|                                        | Wildtype | <i>Jag1</i> <sup>flox/+</sup> | <i>Jag1</i> <sup>flox/flox</sup> | <i>Pax3</i> <sup>Cre/+</sup> | <i>Pax3</i> <sup>Cre/+</sup><br><i>Jag1</i> <sup>flox/+</sup> | <i>Pax3</i> <sup>Cre/+</sup><br><i>Jag1</i> <sup>flox/flox</sup> |
| <b>Total analyzed</b>                  | <b>6</b> | <b>32</b>                     | <b>27</b>                        | <b>8</b>                     | <b>36</b>                                                     | <b>29</b>                                                        |
| Normal                                 | 6        | 31                            | 26                               | 8                            | 29                                                            | 6                                                                |
| Short or absent brachiocephalic artery | 0        | 1                             | 1                                | 0                            | 6                                                             | 18                                                               |
| Common carotid trunk                   | 0        | 0                             | 0                                | 0                            | 1                                                             | 2                                                                |
| Aberrant right subclavian artery       | 0        | 0                             | 0                                | 0                            | 0                                                             | 3                                                                |

*Pax3<sup>Cre/+</sup> Z/EG*

*Pax3<sup>Cre/+</sup> DNMA1L Z/EG*

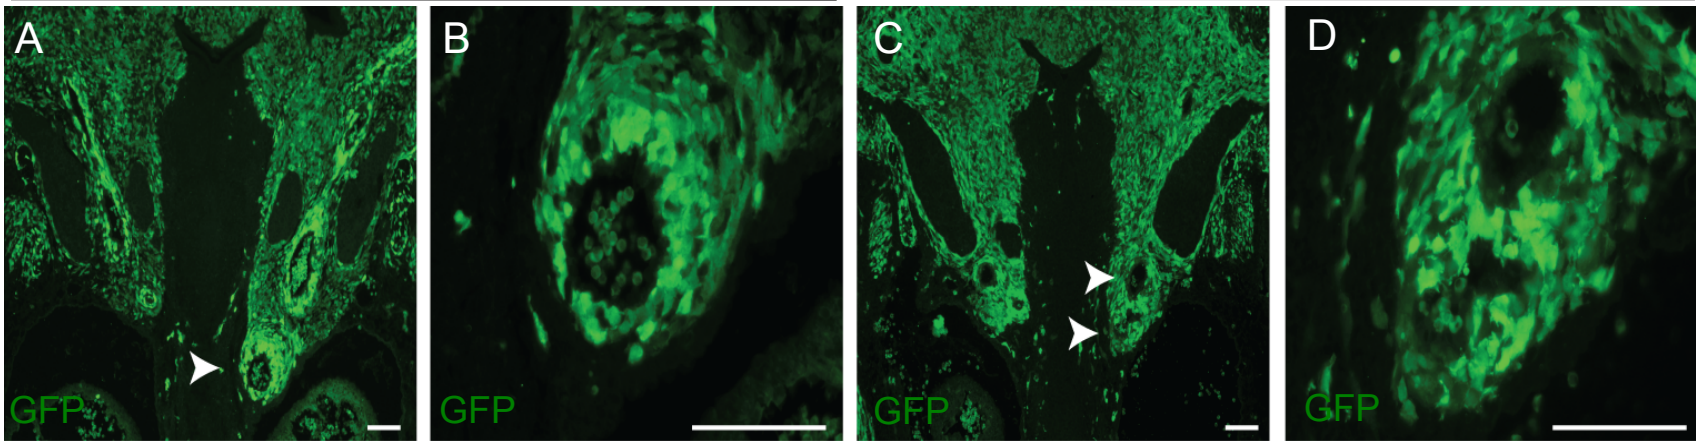

Supplemental Figure S1

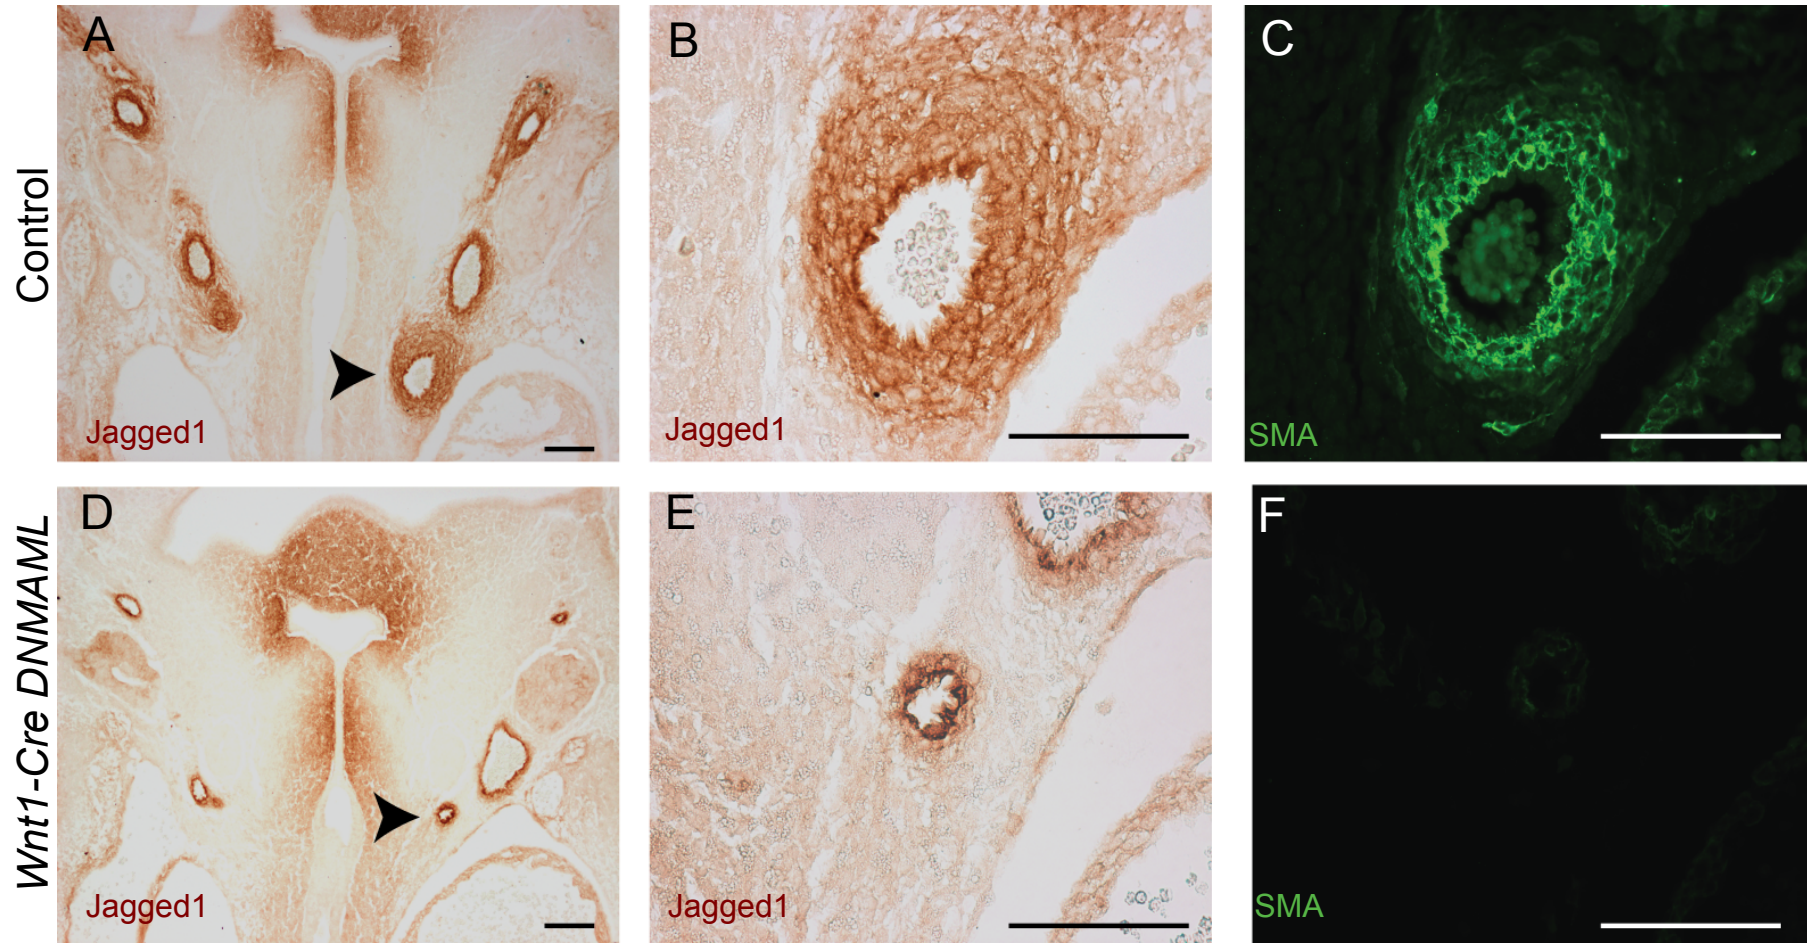

Supplemental Figure S2

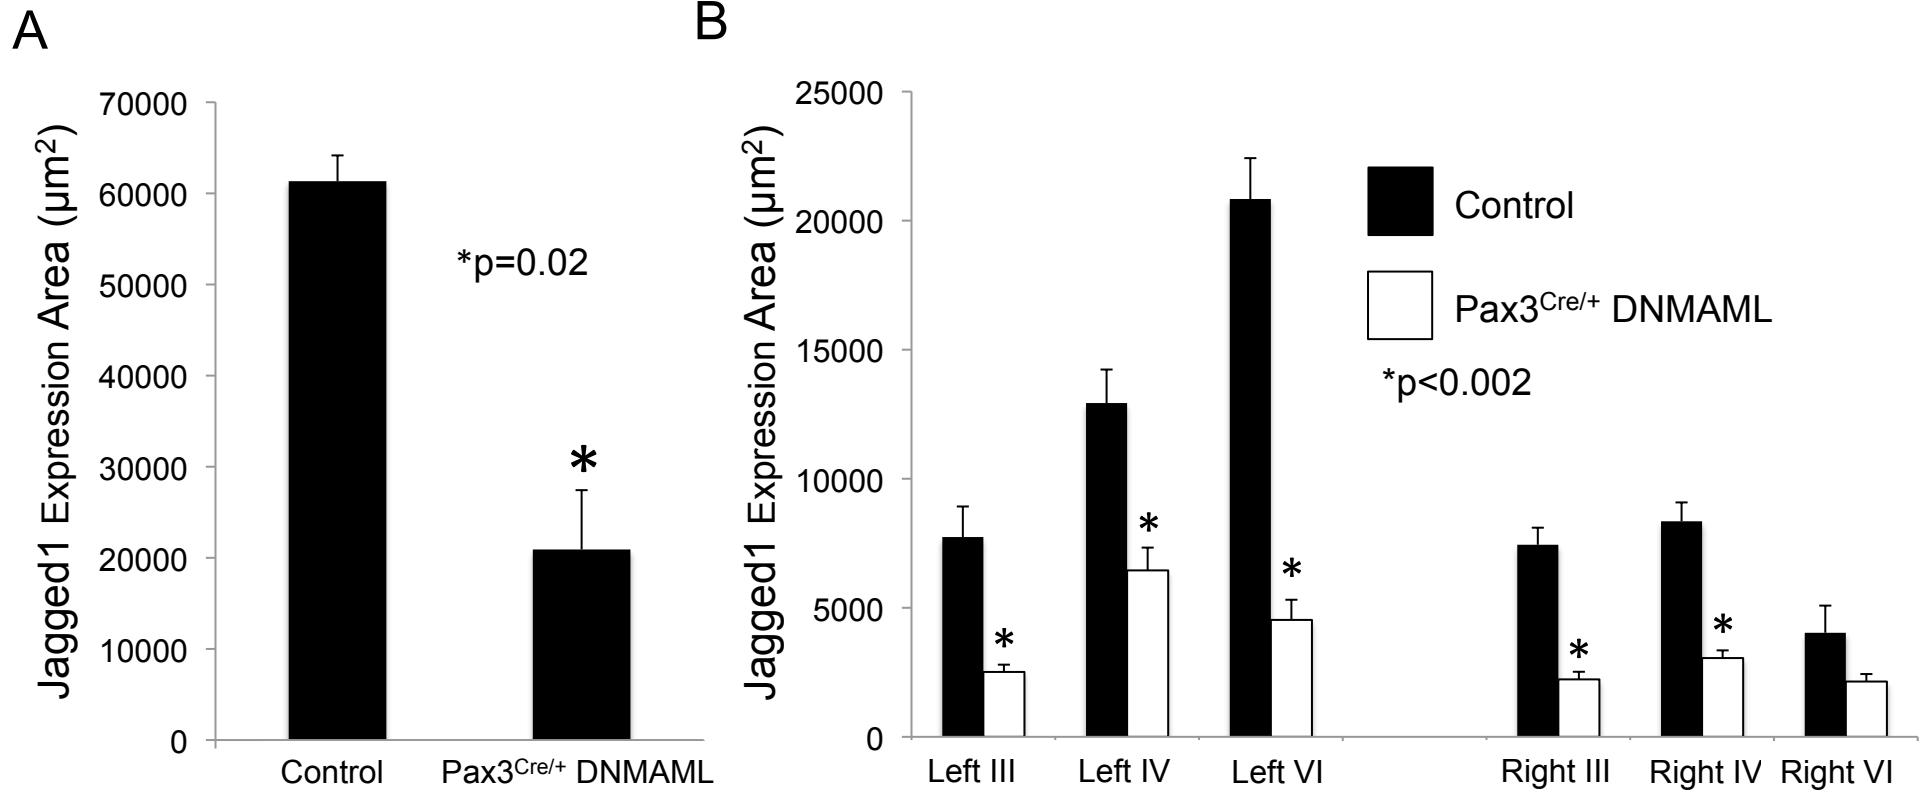

Supplemental Figure S3



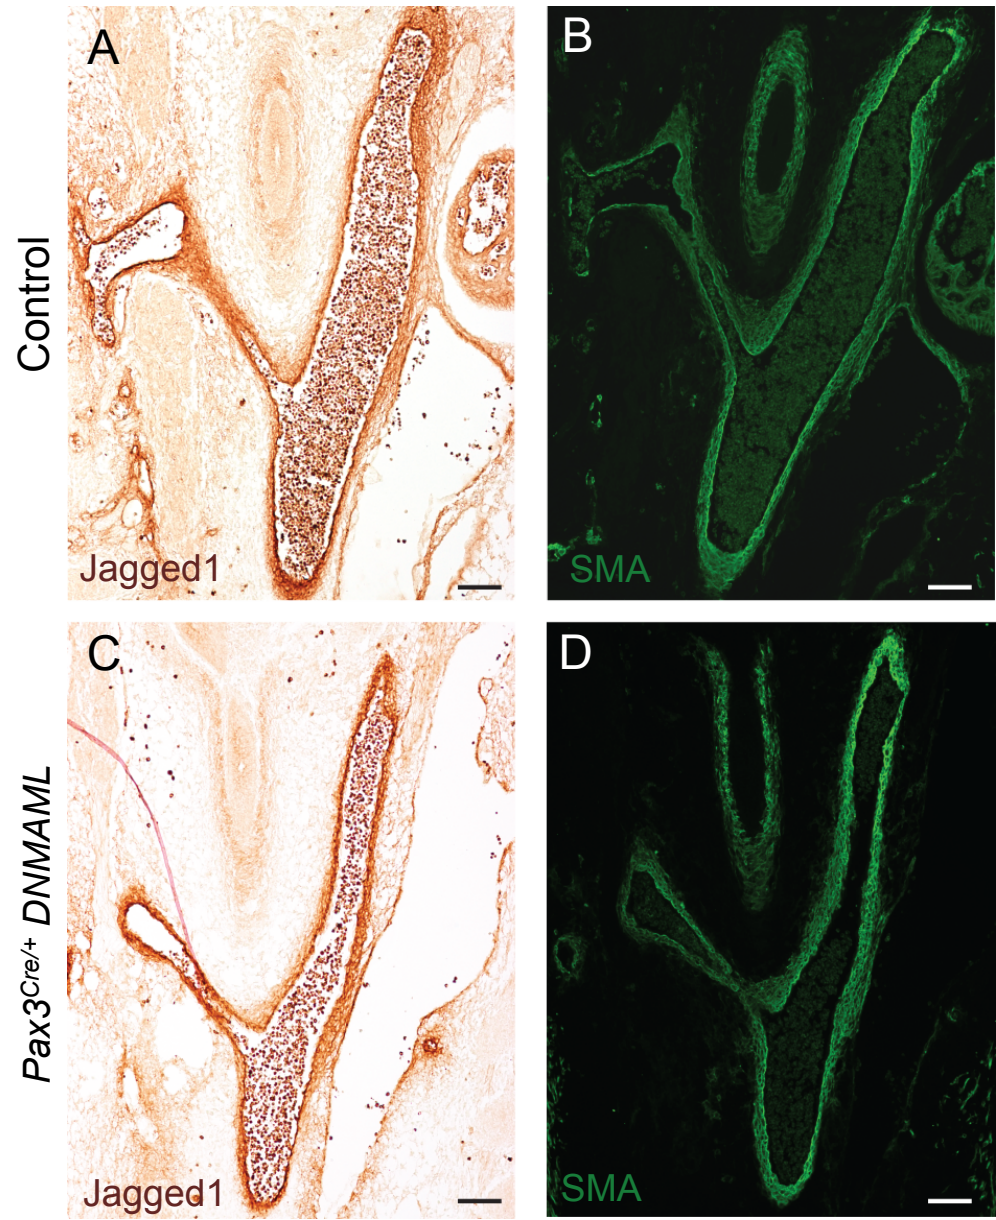

Supplemental Figure S4

Control

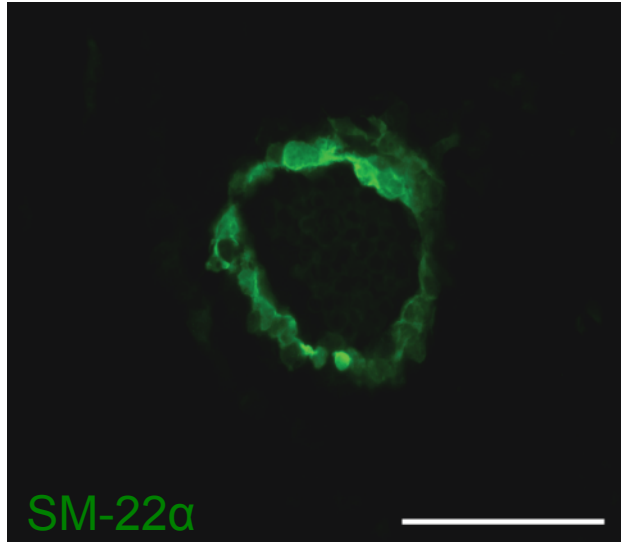

Pax3<sup>Cre/+</sup>; Jagged1<sup>flox/flox</sup>

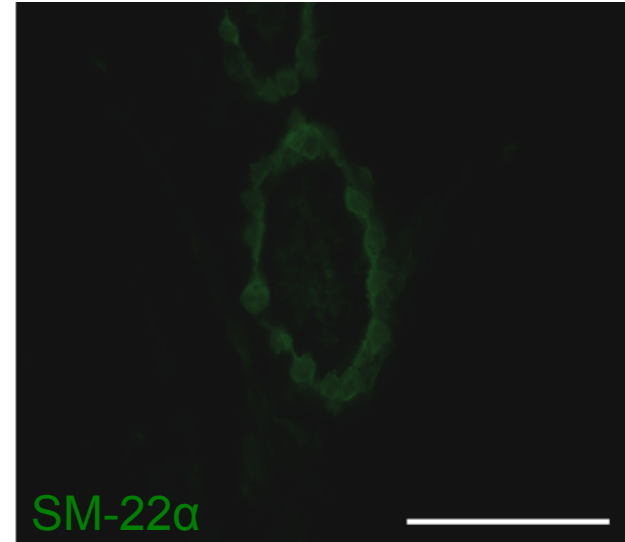

Supplemental Figure S5

## Supplemental Figure Legends

**Supplemental Figure S1.** Inhibition of Notch in the neural crest does not alter neural crest cell number. (A-B) Frontal sections of E12.5 *Pax3<sup>Cre/+</sup> Z/EG* embryos. (C-D) Frontal sections of E12.5 *Pax3<sup>Cre/+</sup> DNAMML Z/EG* embryos. (A-D) Immunostaining of GFP in control (A-B) and Notch inhibited mutants (C-D). No alteration of neural crest cell localization or number was observed in animals expressing the DNAMML allele. Scale bars: 100 $\mu$ m.

**Supplemental Figure S2.** Inhibition of Notch in neural crest impairs Jagged1 expression. (A-C) Frontal sections of E12.5 control embryos. (D-F) Frontal sections of E12.5 *Wnt1-Cre DNAMML* embryos. (A, B, D and E) Immunostaining of Jagged1 in control (A and B) and Notch inhibited mutants (D and E). Notch inhibited animals display decreased Jagged1 protein expression. The most marked decrease in Jagged1 protein is observed at the left sixth arch artery (arrowheads in A, D and shown in higher magnification in B, E, respectively). (C, F) Adjacent sections to those shown in B, E, respectively, stained for smooth muscle actin (SMA). *Wnt1-Cre DNAMML* embryos display a decrease in SMA expression (F) indicating decreased smooth muscle differentiation as compared to control embryos (C). Scale bars: 100 $\mu$ m.

**Supplemental Figure S3.** Quantification of Jagged1 expression following Inhibition of Notch in neural crest. (A) Overall Jagged1 expression surrounding the six aortic arch arteries in control and *Pax3<sup>Cre/+</sup> DNAMML* embryos. Jagged1 protein expression area was calculated using ImageJ software (National Institutes of Health, Bethesda, MD,

USA, <http://imagej.nih.gov/ij/>, 1997-2011). Jagged1 positive area was determined based upon the presence of brown stain at the cell membranes. Seven pairs of control and *Pax3<sup>Cre/+</sup> DNMAML* embryos from 3 independent litters were included in the analysis. From each embryo, 4 non-consecutive sections were stained for Jagged1 and areas were calculated covering ~50 $\mu$ m of each artery. Overall Jagged1 protein expression is significantly decreased in *Pax3<sup>Cre/+</sup> DNMAML* embryos. Data represent the mean + standard error of the mean (SEM). (B) Jagged1 protein expression area at each individual arch artery is indicated. Jagged1 protein expression is significantly decreased at all arch arteries, except the right sixth. Data represent the mean + standard error of the mean (SEM). Asterisks denote statistically significant differences between the wildtype and *Pax3<sup>Cre/+</sup> DNMAML* embryos, as assessed a two-tailed, paired *t* test.

**Supplemental Figure S4.** Jagged1 expression is not affected in all vascular smooth muscle when Notch is inhibited in the neural crest. (A-D) Frontal sections of E12.5 embryos. Examination of Jagged1 protein and smooth muscle actin expression along the descending aorta in control and *Pax3<sup>Cre/+</sup> DNMAML* embryos. The vascular smooth muscle surrounding the descending aorta is not derived from neural crest and is not affected by inhibition of Notch by DNMAML in neural crest indicating that smooth muscle defects are cell autonomous and not generalized in these embryos. Scale bars: 100 $\mu$ m.

**Supplemental Figure S5.** Inactivation of Jagged1 in neural crest results in decreased smooth muscle differentiation. (A-B) Frontal sections of E12.5 mouse embryos. (A, B)

Left sixth aortic arch arteries of control (A) and *Pax3*<sup>Cre/+</sup>; *Jagged1*<sup>flox/flox</sup> (B) embryos stained for SM-22 alpha (SM-22 $\alpha$ ). Scale bars: 100 $\mu$ m.

### **Supplemental References**

1. Jiang X, Rowitch DH, Soriano P, McMahon AP, Sucov HM. Fate of the mammalian cardiac neural crest. *Development*. 2000;127:1607-1616.
2. Novak A, Guo C, Yang W, Nagy A, Lobe CG. Z/EG, a double reporter mouse line that expresses enhanced green fluorescent protein upon Cre-mediated excision. *Genesis*. 2000; 28: 147-155.

**Supplemental Movie 1.** Optical projection tomography of E11.5 ECR6-lacZ embryo shows extent of X-gal staining.
